# Supplementary material for: Flexible percolation fibrous thermal insulating composite membranes for thermal management
Source: Royal Society of Chemistry journal article supplement (doi:10.1039/d2ma00915c), 2022-11-23
Supplement: d2ma00915c1.pdf [file d2ma00915c1.pdf]

## Supporting information

Flexible Percolation Fibrous Thermal Insulating Composite Membrane for Thermal Management

Lu An<sup>1</sup>, Massimiliano Di Luigi<sup>1</sup>, Jingye Tan<sup>1</sup>, Danial Faghihi<sup>1</sup> and Shenqiang Ren<sup>1,2,3\*</sup>

<sup>1</sup> Department of Mechanical and Aerospace Engineering, University at Buffalo, The State University of New York, Buffalo, NY 14260, USA

<sup>2</sup> Department of Chemistry, University at Buffalo, The State University of New York, Buffalo, NY 14260, USA

<sup>3</sup> Research and Education in Energy Environment & Water Institute, University at Buffalo, The State University of New York, Buffalo, NY 14260, USA

E-mail: shenren@buffalo.edu

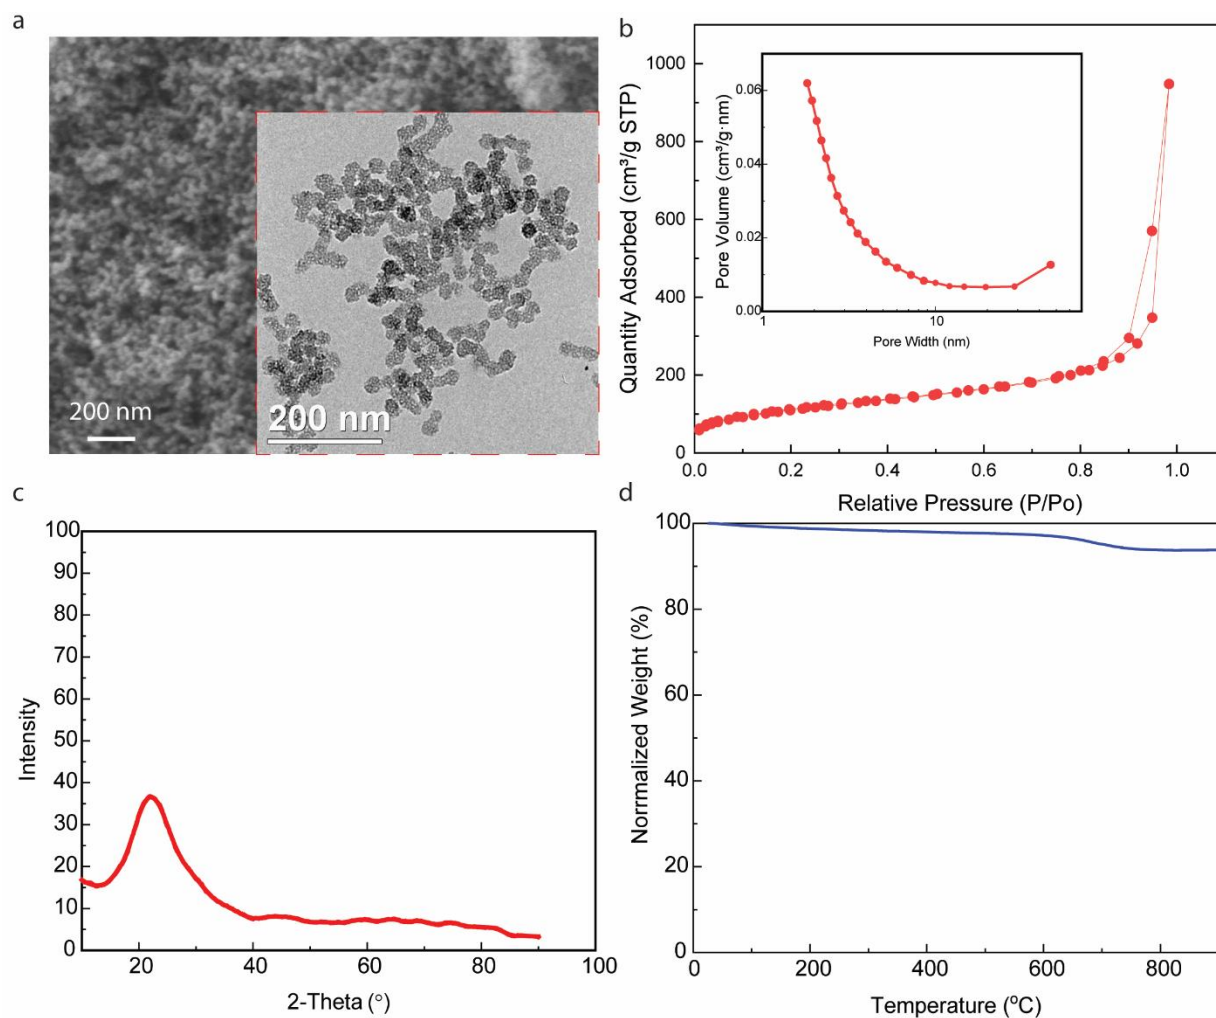

Figure S1. (a) SEM image of porous silica materials. The inset TEM image showing the mesoporous silica networks. (b) Nitrogen adsorption–desorption isotherms of the powders by the Brunauer–Emmett–Teller (BET) theory. The inset is pore size distribution by the BJH method. (c) XRD spectrum of powders. (d) TGA of porous powder-fibers composite.

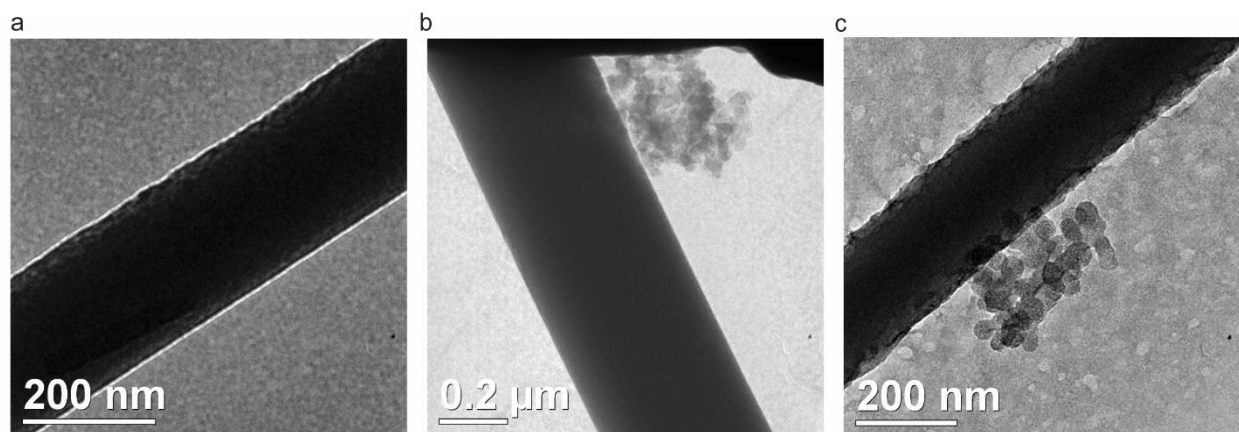

Figure S2. TEM images of fiber-porous silica powders. The fiber diameter is hundred nanometers, and the clean surface indicate the little powders coating without acid treatment.

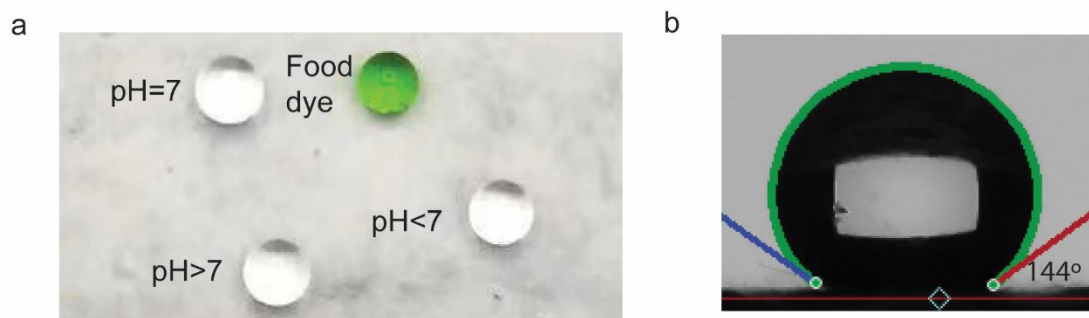

Figure S3. Hydrophobic performance of membrane. Water contact angel of  $144^\circ$  and the different pH solution resistance.

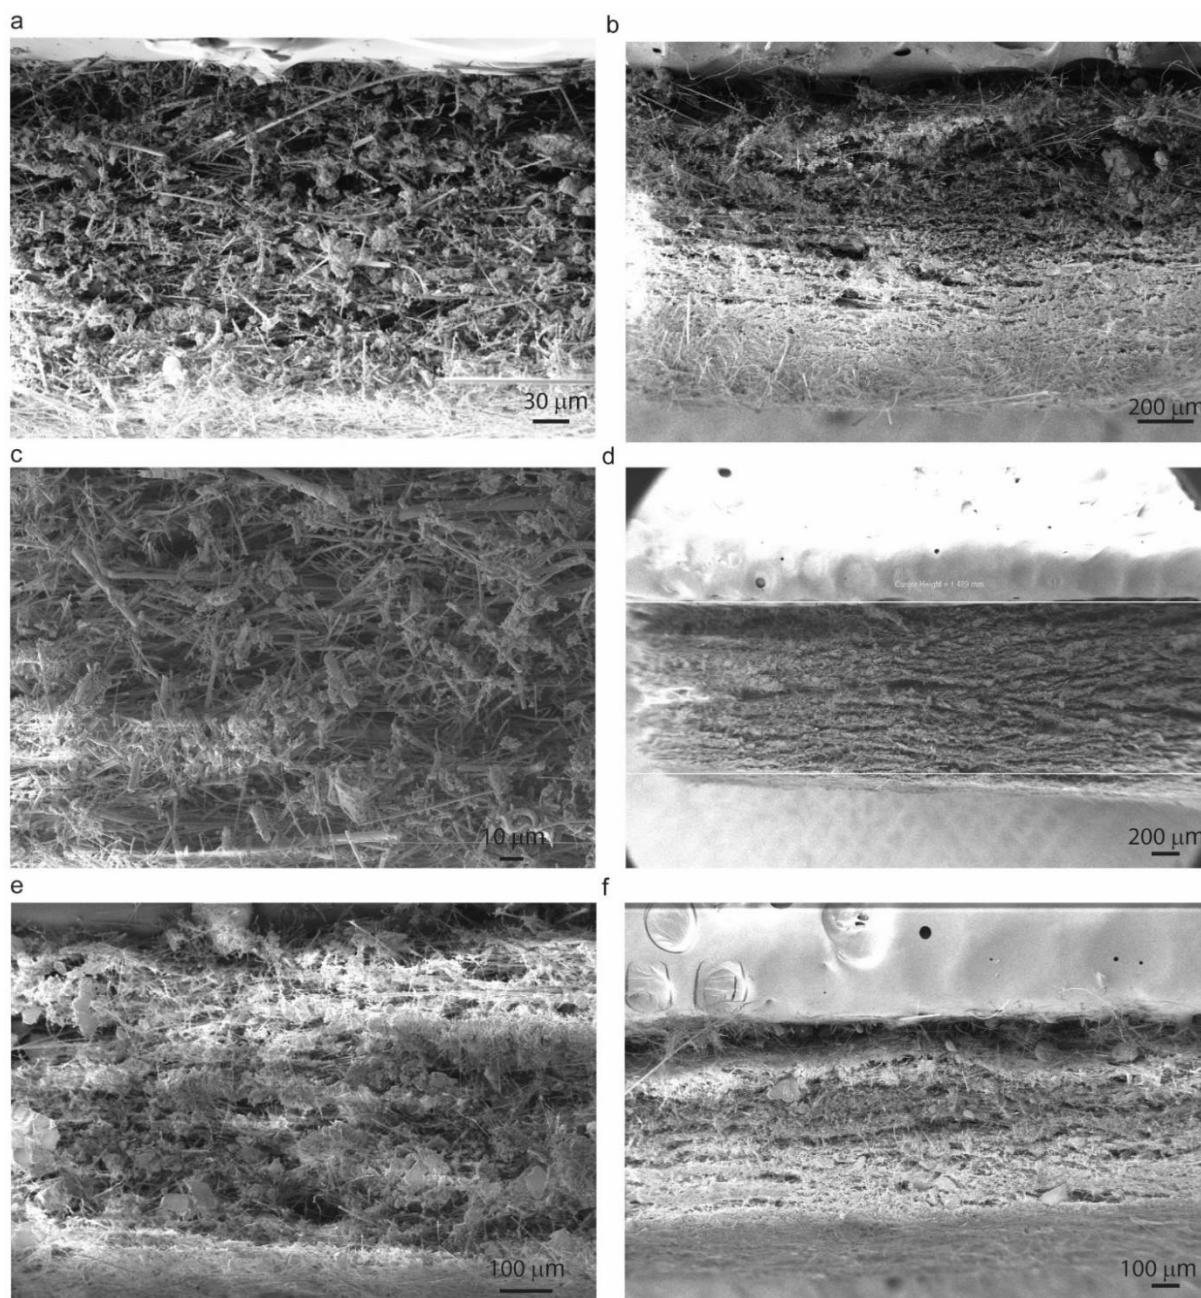

Figure S4. Cross-section SEM images of different composite membranes. (a) 33 wt% porous silica with thickness of 0.3 mm, (b) 33 wt.% porous silica with thickness of 0.9 mm. (c) 50 wt% porous silica with thickness of 0.3 mm, (d) 50 wt.% porous silica with thickness of 1.3 mm. (e) 67 wt% porous silica with thickness of 0.3 mm, (f) 67 wt.% porous silica with thickness of 0.9 mm.

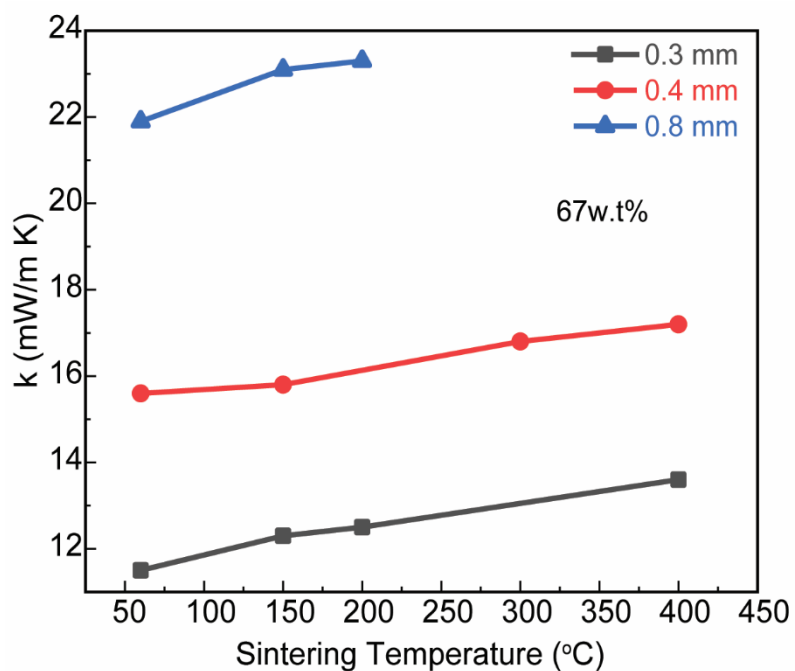

Figure S5. Sintering temperature vs. thermal conductivity of membranes with 67 wt.% pure porous silica and with 0.8 mm thickness. The higher temperature would cause a higher thermal conductivity.

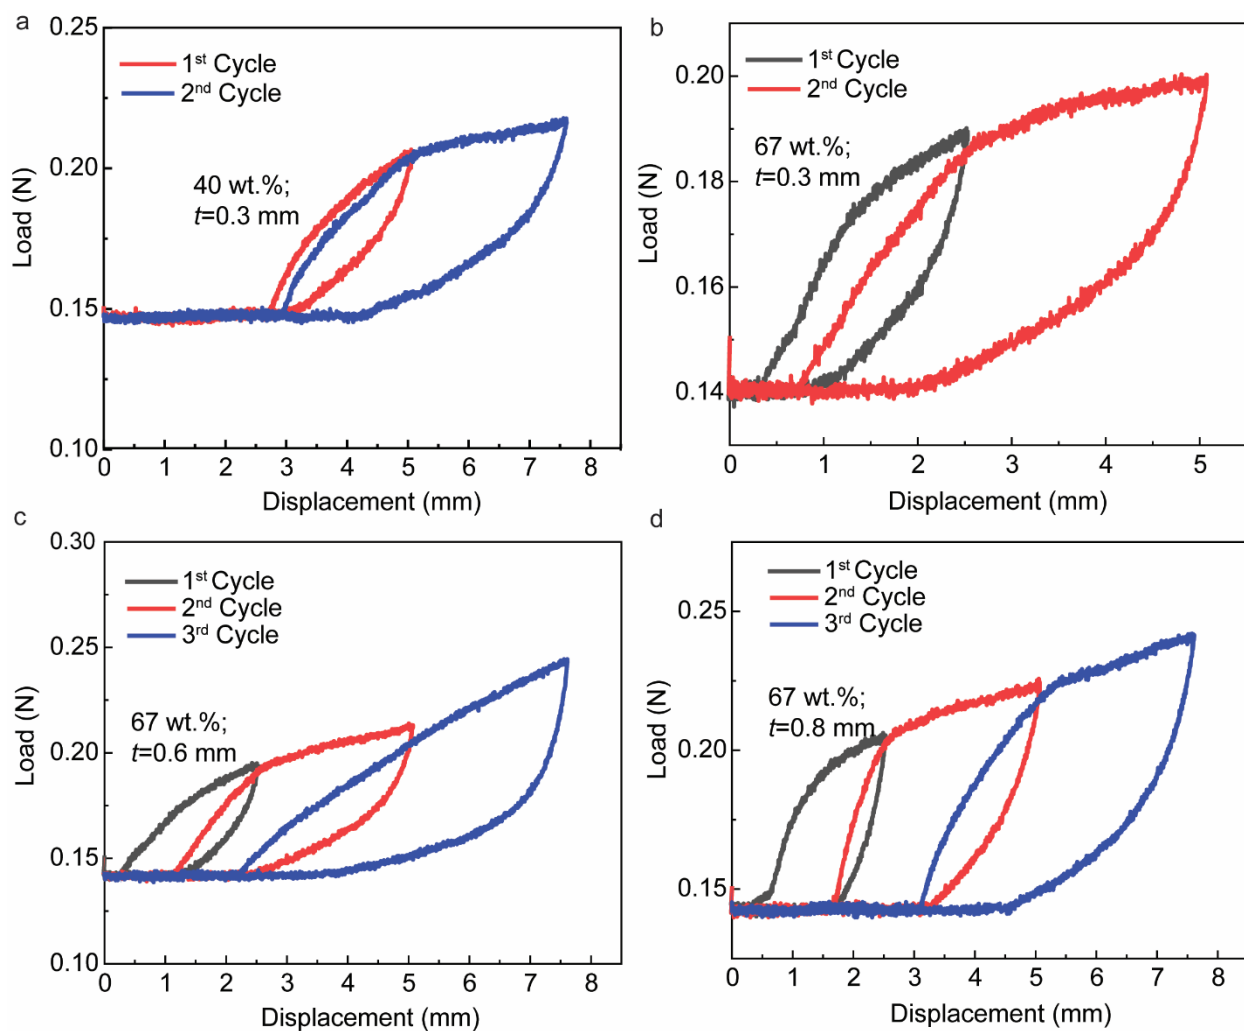

Figure S6. Multiple load-displacement cycles of composite membranes with (a) 40 wt.% porous silica and with thickness of 0.3 mm. (b-c) 67 wt.% porous silica materials and with thickness of 0.3mm, 0.6 mm, and 0.8 mm.
